# Supplementary material
Source: PubMed Central journal article supplement (PMC3820945)
Supplement: supp_O113.028456_mcp.O113.028456-6.pdf [file supp_O113.028456_mcp.O113.028456-6.pdf]

# Supplemental Figure 1

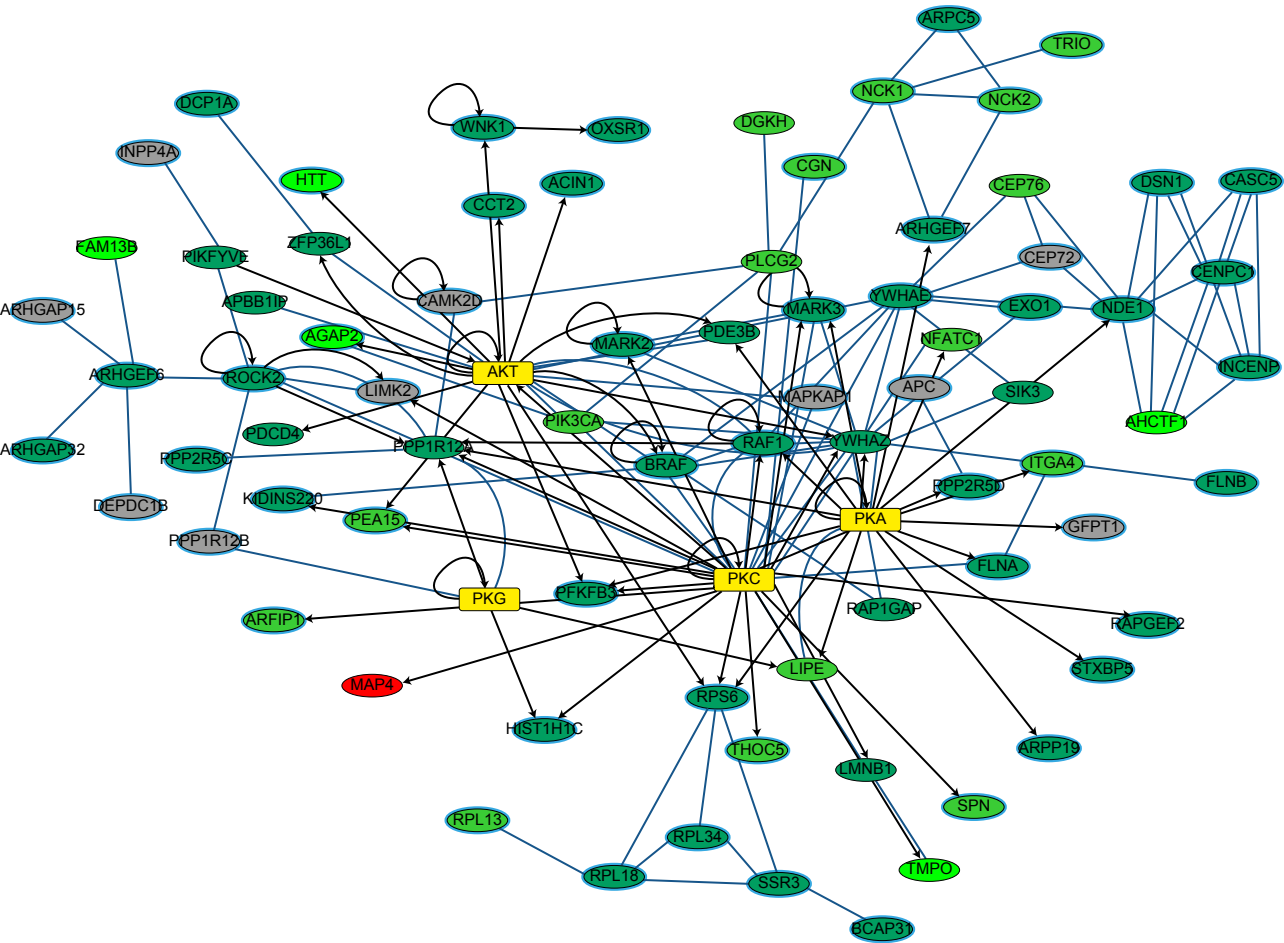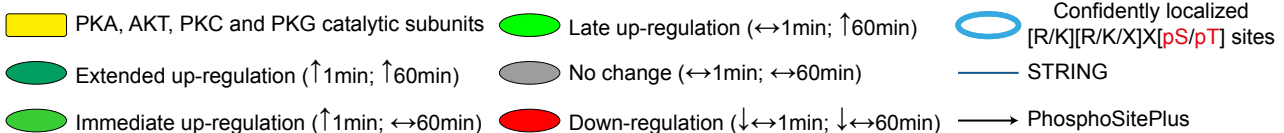

# Supplemental Figure 2

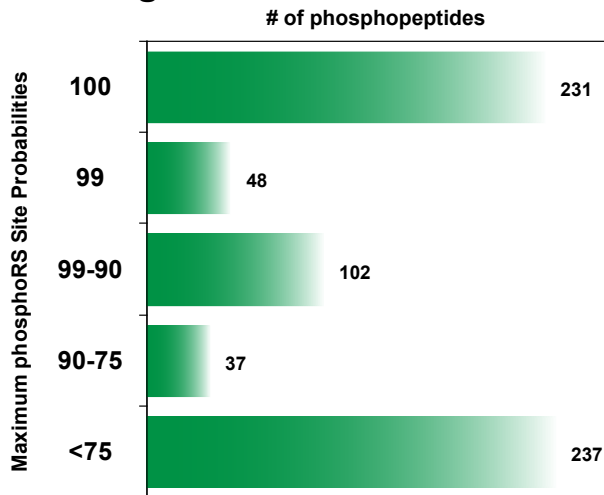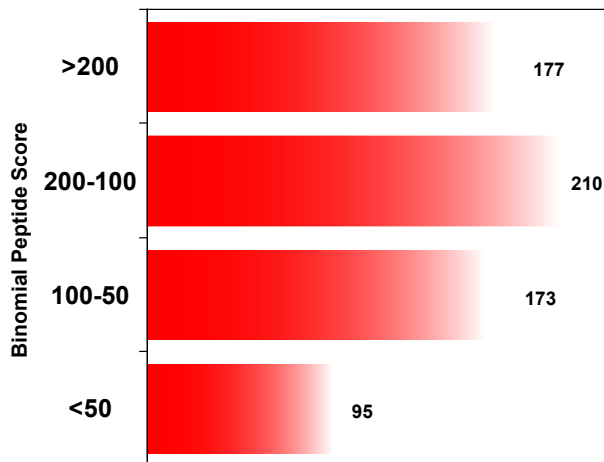

**Supplemental Figure 1. Interaction map for regulated PGE<sub>2</sub> downstream substrates and the PGE<sub>2</sub>-sensible upstream basophilic kinases.** Protein-protein interactions were derived from both the STRING database using experimental and database lines of evidence and “high confidence” interactions (score > 0.700) while the substrate lines derived from the search function in the PhosphoSitePlus database. The interaction map was generated using Cytoscape.

**Supplemental Figure 2. Distribution of localization scores for the identified phosphopeptides.** Histograms illustrating the localization score distribution of the phosphorylated peptides that were identified from the analysis of the eluate. Data bars are normalized to the highest value within each population.
